# Supplementary material for: Two B-Box Proteins, MaBBX20 and MaBBX51, Coordinate Light-Induced Anthocyanin Biosynthesis in Grape Hyacinth
Source: MDPI journal article supplement (doi:10.3390/ijms23105678), 2022-05-19
Supplement: s1 [file s1]

## Supplementary Material

### Supplementary Figure

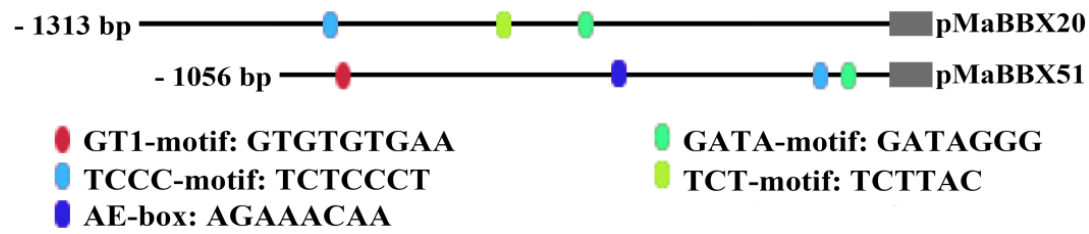

Figure S1. The light-responsive elements of the *MaBBX20* and *MaBBX51* promoters.

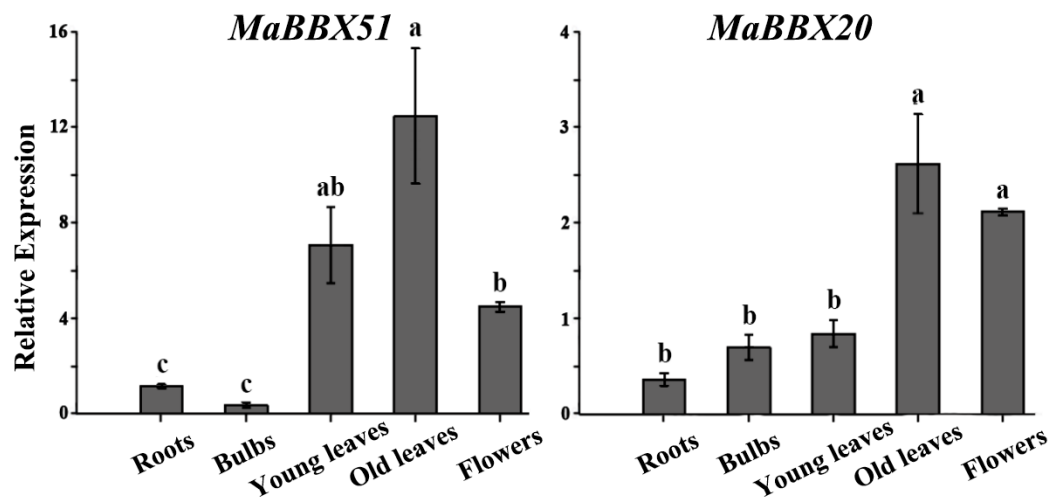

Figure S2. The expression patterns of *MaBBX20* and *MaBBX51* in various tissues (roots, bulbs, young leaves, old leaves, and flowers) of *M. aucheri* 'Dark Eyes'. *MaActin* was used as the reference gene. Data are presented as the mean  $\pm$  SD. Different letters above the bars indicate significantly different values calculated using one-way ANOVA followed by LSD analysis ( $P < 0.05$ ).

## Supplementary Tables

Table S1. Primer sequences.

| Primers for cloning             | Sequence (5' to 3')                                         |
|---------------------------------|-------------------------------------------------------------|
| MaBBX51-cDNA-full length-F      | ATGAAGATTCAGTGTGATGCTTGTGAG                                 |
| MaBBX51-cDNA-full length-R      | CTATCCTAAATCTGGGACTGTGAAGTA                                 |
| MaBBX20-cDNA-full length-F      | GAGATTCCAGAACATCGGTTGCTACTG                                 |
| MaBBX20-cDNA-full length-R      | TGATGGTCATAGGAGGATGCATGTC                                   |
| pMaBBX51-SP1                    | GGCATGAAGGATGATGGGCTTCCT                                    |
| pMaBBX51-SP2                    | ATTGAACCTAGCGCCACCGGATACC                                   |
| pMaBBX51-SP3                    | TGAAGGCAGGCTTTTCTTGGCAGAC                                   |
| pMaBBX20-SP1                    | AGCTCCCCAGCAAGTACTTACACTGT                                  |
| pMaBBX20-SP2                    | CCAGAGTAGCAGTTTATCGTATGCC                                   |
| pMaBBX20-SP3                    | GCAGGCTGTGAAACACATCGATCGCA                                  |
| Primers for vector construction | Sequence (5' to 3')                                         |
| MaBBX51-2300-F- BamHI           | CGAGCTCGGTACCCGGG <u>GGATCC</u> ATGAAGATTCAGTGTGATGCTTGTGAG |
| MaBBX51-2300-R- SalI            | CTTGCTCACCATGGTGT <u>TCGACT</u> CCTAAATCTGGGACTGTGAAGTA     |
| MaBBX20-2300-F-BamHI            | CGAGCTCGGTACCCGGG <u>GGATCC</u> ATGAAGATTCAGTGTGATGCTTGTGAG |
| MaBBX20-2300-R-SalI             | CGAGCTCGGTACCCGGG <u>GATCCT</u> CCTAAATCTGGGACTGTGAAGTA     |
| MaBBX51-GBKT7-F-SmaI            | CATGGAGGCCGAATT <u>CCCGGG</u> ATGAAGATTCAGTGTGATGCTTGTGAG   |
| MaBBX51-GBKT7-R-SalI            | ATGCGGCCGCTGCAGG <u>GTTCGAC</u> TATCCTAAATCTGGGACTGTGAAGTA  |
| MaBBX20-GBKT7-F-SmaI            | CATGGAGGCCGAATT <u>CCCGGG</u> ATGGGCTCTCTTTGTGACTTCTGCGGG   |
| MaBBX20-GBKT7-R-SalI            | ATGCGGCCGCTGCAGG <u>GTTCGAC</u> TCAGTAGCTTCGCGTC            |
| MaBBX51-NE-F-BamHI              | CCAGGCCTACTAGT <u>GGATCC</u> ATGAAGATTCAGTGTGA              |
| MaBBX51-NE-R-SalI               | GCGGTACCCTCGAGG <u>GTTCGAC</u> CTATCCTAAATCTGG              |
| MaBBX20-NE-F-BamHI              | CCAGGCCTACTAGT <u>GGATCC</u> ATGGGCTCTCTTTGTGACTTCTG        |
| MaBBX20-NE-R-SalI               | GCGGTACCCTCGAGG <u>GTTCGAC</u> TCCTAAATCTGGGACTG            |
| MaHY5-NE-F-BamHI                | CCAGGCCTACTAGT <u>GGATCC</u> ATGCAGGAGCCGGCGACGAGCTC        |
| MaHY5-NE-R-SalI                 | GCGGTACCCTCGAGG <u>GTTCGAC</u> CTATGGCCCTTCACCAT            |
| MaMybA-NE-F-BamHI               | CCAGGCCTACTAGT <u>GGATCC</u> ATGGAACCCAAGCTCAAGTCATC        |
| MaMybA-NE-R-SalI                | GCGGTACCCTCGAGG <u>GTTCGAC</u> TCATAACAAGTTATGGGCATGGAGC    |

| MaBBX51-CE-F-BamHI      | GGCGCGCCACTAGT <u>GGATCC</u> ATGAAGATTCAGTGTGA                  |                       |
|-------------------------|-----------------------------------------------------------------|-----------------------|
| MaBBX51-CE-R-SalI       | GCGGTACCCTCGAG <u>GTCGAC</u> TCCTAAATCTGGGACTG                  |                       |
| MaBBX20-CE-F-BamHI      | GGCGCGCCACTAGT <u>GGATCC</u> ATGGGCTCTCTTTGTGACTTCTG            |                       |
| MaBBX20-CE-R-SalI       | TACATCCCGGGAGC <u>GTCGAC</u> TCCTAAATCTGGGACTGTGAAG             |                       |
| MaHY5-CE-F-BamHI        | GGCGCGCCACTAGT <u>GGATCC</u> ATGCAGGAGCCGGCGAC                  |                       |
| MaHY5-CE-R-SalI         | TACATCCCGGGAGC <u>GTCGAC</u> CTATGGCCCTTCACCATTGGCGCTAC         |                       |
| MaBBX51-62sk-F-EcoRI    | CCCCCGGGCTGCAG <u>GAATTC</u> ATGAAGATTCAGTGTGATGCTTGTGAG        |                       |
| MaBBX51-62sk-R-KpnI     | GATTCAGCGAATT <u>GGTACC</u> CTATCCTAAATCTGGGACTGTGAAG           |                       |
| MaBBX20-62sk-F-EcoRI    | CCCCCGGGCTGCAG <u>GAATTC</u> ATGGGCTCTCTTTGTGACTTCTG            |                       |
| MaBBX20-62sk-R-KpnI     | GATTCAGCGAATT <u>GGTACC</u> CTAGTAGCTTCGCGTCCGGCAGAG            |                       |
| MaHY5-62sk-F-EcoRI      | CCCCCGGGCTGCAG <u>GAATTC</u> ATGCAGGAGCCGGCGACGA                |                       |
| MaHY5-62sk-R-KpnI       | GATTCAGCGAATT <u>GGTACC</u> CTATGGCCCTTCACCATTGGCGCTACCGC       |                       |
| MaMybA -62sk-F-EcoRI    | CCCCCGGGCTGCAG <u>GAATTC</u> ATGGAACCCAAGCTCAAGTCATC            |                       |
| MaMybA -62sk-R-KpnI     | GATTCAGCGAATT <u>GGTACC</u> CTATAACAAGTTATGGGCATGGAGC           |                       |
| pMaMybA-0800LUC-F-SalI  | GGCCCCCCTCGAG <u>GTCGACA</u> ACGGCACCATAGCACGGTACAAT            |                       |
| pMaMybA-0800LUC-R-BamHI | GCTCTAGAACTAGT <u>GGATCC</u> TATTAGCTTTTGCAGCAAGCTGAATTC        |                       |
| pMaDFR-0800LUC-F-SalI   | GGCCCCCCTCGAG <u>GTCGAC</u> GTGGAGTAGCATAGGAACGAGAG             |                       |
| pMaDFR-0800LUC-R-BamHI  | GCTCTAGAACTAGT <u>GGATCC</u> CTTGTGTGTGATTGTGTTGGGAG            |                       |
| MaBBX51-GADT7-F-EcoRI   | GCCATGGAGGCCAGT <u>GAATTC</u> ATGAAGATTCAGTGTGATGCTTGTGAGAAGGCG |                       |
| MaBBX51-GADT7-R-BamHI   | CTGCAGCTCGAGCTCGAT <u>GGATCC</u> TCCTAAATCTGGGACTGTGAAGTACTCTTC |                       |
| MaBBX20-GADT7-F-EcoRI   | GCCATGGAGGCCAGT <u>GAATTC</u> ATGGGCTCTCTTTGTGACTTCTGCGGGGAGC   |                       |
| MaBBX20-GADT7-R-BamHI   | CTGCAGCTCGAGCTCGAT <u>GGATCC</u> GTAGCTTCGCGTCCGGCAGAGTGGATCAT  |                       |
| MaHY5-GADT7-F-EcoRI     | GCCATGGAGGCCAGT <u>GAATTC</u> ATGCAGGAGCCGGCGACGAGCTC           |                       |
| MaHY5-GADT7-R-BamHI     | CTGCAGCTCGAGCTCGAT <u>GGATCC</u> TGGCCCTTCACCATTGGCGCTACC       |                       |
| pMaMybA-AbAi-F-KpnI     | TTCGAGCTC <u>GGTACCA</u> ACGGCACCATAGCACGGTACAAT                |                       |
| pMaMybA-AbAi-R-SalI     | ATGCCTCGAG <u>GTCGAC</u> TATTAGCTTTTGCAGCAAGCTGAATTC            |                       |
| pMaDFR-AbAi-F-KpnI      | TTCGAGCTC <u>GGTACCG</u> TGGAGTAGCATAGGAACGAGAG                 |                       |
| pMaDFR-AbAi-R-SalI      | ATGCCTCGAG <u>GTCGAC</u> CTTGTGTGTGATTGTGTTGGGAG                |                       |
| Primers for qPCR        | Sequence (5' to 3')                                             | Source                |
| MaBBX51-qPCR-F          | GCCAAGAAAAGCCTGCCTTC                                            |                       |
| MaBBX51-qPCR-R          | GGATACCGGTTGCCAGGTAG                                            | specifically designed |
| MaBBX20-qPCR-F          | CCGGCAAGGAAAGCACATTC                                            |                       |

|                |                         |                  |
|----------------|-------------------------|------------------|
| MaBBX20-qPCR-R | CGAATCTACCCTTCTCCCGC    |                  |
| MaHY5-qPCR-F   | TGGAGAGCGATGAGGAGATAA   | Cao et al. 2019  |
| MaHY5-qPCR-R   | TAAGCCGCTTGTGCTCTTT     |                  |
| MaDFR-qPCR-F   | GAGAGAGCTGCATGGGATTT    |                  |
| MaDFR-qPCR-R   | TGGCATGGTTGAGGTGATG     | Chen et al. 2017 |
| MaANS-qPCR-F   | GAGCCTCTCCCTTCCAGCC     |                  |
| MaANS-qPCR-R   | TTCCACCTCATATTCCTCCGC   |                  |
| MaMybA-qPCR-F  | TCCAGAGGTGTCGAAAGA      | Chen et al. 2019 |
| MaMybA-qPCR-R  | TGTGTAGGCGCATGATAAG     |                  |
| MaAN2-qPCR-F   | CATGAACGGCAGACGAATCT    |                  |
| MaAN2-qPCR-R   | GAAATTAGCATTCAAGCCATCCC | Chen et al. 2017 |
| MabHLH1-qPCR-F | GCAATGCTCAGTTTGCAGATAG  | Chen et al. 2019 |
| MabHLH1-qPCR-R | CTCTAGGACACCATCCATGAAG  |                  |
| MaActin-qPCR-F | AACATTCAGAAAGAGTCCACCC  |                  |
| MaActin-qPCR-R | GCTTACCAGCAAAGATCAACCG  |                  |
| NtCHS-qPCR-F   | TGACACCCACTTGGATAGTTTAG |                  |
| NtCHS-qPCR-R   | CGACCTCTGGAATTGGATCAG   |                  |
| NtCHI-qPCR-F   | CTTTCTCGCCGCTAAATG      |                  |
| NtCHI-qPCR-R   | TTTCTGCCACCTTCTCTG      |                  |
| NtF3H-qPCR-F   | CAAGGCATGTGTGGATATGG    |                  |
| NtF3H-qPCR-R   | TGTGTCGTTTCAGTCCAAGG    | Chen et al. 2017 |
| NtDFR-qPCR-F   | AACCAACAGTCAGGGGAATG    |                  |
| NtDFR-qPCR-R   | TTGGACATCGACAGTTCCAG    |                  |
| NtANS-qPCR-F   | TGGCGTTGAAGCTCATACTG    |                  |
| NtANS-qPCR-R   | GGAATTAGGCACACACTTTGC   |                  |
| NtUFGT-qPCR-F  | GAGTGCATTGGATGCCTTTT    |                  |
| NtUFGT-qPCR-R  | CCAGCTCCATTAGGTCCTTG    |                  |
| NtTubA1-qPCR-F | CTCCTATGCTCCTGTCATTTC   |                  |
| NtTubA1-qPCR-R | GGCGAGGATCACACTTAAC     |                  |

Table S2. GenBank accession numbers for the known B-box proteins listed in Figure 1 and 2.

| Name    | GenBank Accession Number | Species                            |
|---------|--------------------------|------------------------------------|
| MaBBX51 | MW160172                 | <i>Muscari aucheri</i> 'Dark Eyes' |
| MaBBX20 | MW160173                 | <i>M. aucheri</i> 'Dark Eyes'      |
| CmBBX8  | KP963933                 | <i>Chrysanthemum indicum</i>       |
| CmBBX13 | KP963935                 | <i>Chr. indicum</i>                |
| CmBBX24 | KF385866                 | <i>Chr. indicum</i>                |
| PpBBX24 | Pdr4g016570              | <i>Pyrus pyrifolia</i>             |
| MdBBX1  | MDP0000202669            | <i>Malus domestica</i>             |
| MdCOL4  | MDP0000232445            | <i>M. domestica</i>                |
| AtBBX1  | AT5G15840                | <i>A. thaliana</i>                 |
| AtBBX2  | AT5G15850                | <i>A. thaliana</i>                 |
| AtBBX3  | AT3G02380                | <i>A. thaliana</i>                 |
| AtBBX4  | AT2G24790                | <i>A. thaliana</i>                 |
| AtBBX5  | AT5G24930                | <i>A. thaliana</i>                 |
| AtBBX6  | AT5G57660                | <i>A. thaliana</i>                 |
| AtBBX7  | AT3G07650                | <i>A. thaliana</i>                 |
| AtBBX8  | AT5G48250                | <i>A. thaliana</i>                 |
| AtBBX9  | AT4G15250                | <i>A. thaliana</i>                 |
| AtBBX10 | AT3G21880                | <i>A. thaliana</i>                 |
| AtBBX11 | AT2G47890                | <i>A. thaliana</i>                 |
| AtBBX12 | AT2G33500                | <i>A. thaliana</i>                 |
| AtBBX13 | AT1G28050                | <i>A. thaliana</i>                 |
| AtBBX14 | AT1G68520                | <i>A. thaliana</i>                 |
| AtBBX15 | AT1G25440                | <i>A. thaliana</i>                 |
| AtBBX16 | AT1G73870                | <i>A. thaliana</i>                 |
| AtBBX17 | AT1G49130                | <i>A. thaliana</i>                 |
| AtBBX18 | AT2G21320                | <i>A. thaliana</i>                 |
| AtBBX19 | AT4G38960                | <i>A. thaliana</i>                 |
| AtBBX20 | AT4G39070                | <i>A. thaliana</i>                 |
| AtBBX21 | AT1G75540                | <i>A. thaliana</i>                 |
| AtBBX22 | AT1G78600                | <i>A. thaliana</i>                 |

---

|         |           |                    |
|---------|-----------|--------------------|
| AtBBX23 | AT4G10240 | <i>A. thaliana</i> |
| AtBBX24 | AT1G06040 | <i>A. thaliana</i> |
| AtBBX25 | AT2G31380 | <i>A. thaliana</i> |
| AtBBX26 | AT1G60250 | <i>A. thaliana</i> |
| AtBBX27 | AT1G68190 | <i>A. thaliana</i> |
| AtBBX28 | AT4G27310 | <i>A. thaliana</i> |
| AtBBX29 | AT5G54470 | <i>A. thaliana</i> |
| AtBBX30 | AT4G15248 | <i>A. thaliana</i> |
| AtBBX31 | AT3G21890 | <i>A. thaliana</i> |
| AtBBX32 | AT3G21150 | <i>A. thaliana</i> |

---

Table S3. Transcription-related abbreviations and motifs in DNA

| Abbreviations | Full Name            |
|---------------|----------------------|
| AE-box        | AGAAACAA (5' to 3')  |
| GATA motif    | GATAGGG (5' to 3')   |
| G-box         | CACGTG (5' to 3')    |
| GT1 motif     | GTGTGTGAA (5' to 3') |
| TCCC motif    | TCTCCCT (5' to 3')   |
| TCT motif     | TCTTAC (5' to 3')    |
